# Supplementary material
Source: PubMed Central journal article supplement (PMC4634054)
Supplement: supp_pp.15.00605_PP2015-00605R1_Supplemental_Material_data1.pdf [file supp_pp.15.00605_PP2015-00605R1_Supplemental_Material_data1.pdf]

## Supplemental Material 1. MYB112 Binding Sites in Target Promoters.

### >MYB6 promoter

TTTTGTAAATTTTAAATTTAATTAATGGGAAAAATGTCATTAAAATCTTCAACTCATTGCAAACATTG  
ATTTAAATCCTCAACTCTCGACGAAACAAAATAAATATTTGACTTTCTAAATAAATATCTAATTTTTT  
TTGACCTGGCGATATTAGACACACTGTTAAGTAAATTAAGTACTAGATCCCGTTAACGGAGTTAATTTTTTT  
GTTAACAGAGGCCATTAATGCAAACGTTATTGTTTCCAACAACAGAGTGACGTCGTTTTGTAATAA  
TGACTGAACATAAATCCCAAATCAATCTAAGATCTCTAAATCAAGCAAATTCCTATCTCTAAATCC  
CCATATGATTTGAACTGGAGATTTAATTGAGCCGTTATGACAAAACGATGACGTTTTATTGTTAGA  
GTAAACGTTGTCGTTTTCAATCAACGAGTATGTTAACACACTAAACGTTCAAGGTTCTATTAACCTACT  
GAACATCATGCCTAATATAGTCATGTCAACAAAAGTTTGATATTTATTTGAAAAGTCAAGAAGTTTTG  
GTATTTATTTGGAAAGTAACATAAGTTTGATATTTGTTTCGTTCCGCGAGAGTTCAAGATTTAAATCA  
AAGTTTTCAATAAGTTGAGAATTTAATGACATTTTTTTCCAAAAGATAACATGTTTGATAAATATTA  
TTTTTGCATTGTATTTTTCTTAACTACCAACTAAATTATAAGAACAGTGAGAGAAAGAAAAAACAAA  
AACCAAATCTAAGGAGAAAAAGTAAAGAGACAAGAAAAAAGAGAAAAAGAAGGTTACTTACTTACCT  
ACCTAATCTCCATTACCCACACACAACACAGCAAAGCACAGCCTCACTTTATCTCCAATAGTCACA  
TGACATAACCAAACTTAGTCAAAGTCTCCTCCTTTTTATATAACCCACAAATTGATCTCTTCTCTC  
TTCTCTTACCCATCTTCTTTCATTACCCATGGGAAGATCTCCTTGTG  
*CODING SEQUENCE INDICATED IN ITALICS*

### >MYB7 promoter

GATTATTAATACAAACCTGTACAAGTTTTTGAACGAGTAAAAAATCATAAGTAATTCATAAATAGTTA  
AAAACAGTATAAAATAGGGGTATGAGTCACGAAAAAATTCGAATGGTGACCGAATCGCACATTAATA  
AAATCTCTGCATATATATATATATATATATTTGTTATTATTTGAACTGCACCGCACTTTATCCGCAGTT  
GAACTGCATGTTCCATTAAGACTCTGAGAGTAATATATATGATAAAGCTTTTATTTATTATAATCAG  
GCTCGACTCATTAGGGTGGAGCGAAAGTGCACGGTCCAAACCTTATGCCTATTTAAAAAATTTACA  
TAAGAAAAAGTTTTTTATTTTTTGGAAAAAAGTTGTCAAATATAATTGATAAAATCCCAAATTT  
CTTTAAATATATATTTAAAGGCCCTGATTTTATTTCTAAATGACTTTTATATAACCAAAGAGCCAATA  
TTTTTGTAATAATGTTAAAACACTCAAGATATACTTCAAAAATAATTGCAAAGATGCCCAAAAAAGTT  
TTACCTAACAAAAGTCCAAAAAAGCAAACATTTACCCTAAGACTCAAATTTATGTTGGGCCGGGT  
CTGGTTATTATTTAAACGATCAAAGCTAGTGTTTTGTTAAACCGCAATTTTGTAGCATTTCATATGTT  
AAGATTTGATGGTTGAAAGGAAAAAATAAATTTGTGAATAATAATGGTTATGAGATCTAAAACATCAAA  
GGAAAATCAAGAAGAGAAAGGTATAAAATATTGAATAAATAATGAATGTGGCAGTTATAGTTTGAT  
GTAGAATAAAAGATTAAACAAAAATCAAGAGCCCCACCAGCCACTCCTTCAAACGTGTCTTACCAACT  
CTCTTCTAGAAGCAATTAGGCTCACCTTCCACCTCCAACACCTCTCTCCCCTTCTCTCTCCATAAAAC  
CCTCAACAACAGAATCAAAGCATCATCATCAGAGAAGAGAGTC

### >MYB32 promoter

tatacgaaacgatttggtgagatatgTTTTAACACTTCTTAAAGGAAGTAGGATAAAGTggaagggtca  
cgaaccactccc catattGCAGCCAAATCTACACCAAACCGTACCCAAAAATGAAATTAACCTTTCCCT  
CAAAACCAACCTTGTTTGTGTCTTCTAGATTAATCCTCCAACTTTTGATTAACCAAAAAATATCA  
AACTAACATGTTCTCCTTTTTCTTTAGAAATCTAACGAATTTATCTTTATACTGATTTGAATATAC  
TTAATTTGGTCAATTTGGATGCCCTTTACAACCTCCTTACCAAACCTACTATGGCAAATATATACTATT  
TTCCATTGTAACATAAATGTCCATAATTTGAATTAATTCGTTGCAGTACGAAACCATCCAATTTGT  
CCAAAAACAAAATCCTTATAACTATTTACTTTAATGAAAATATATCCTCTACTTTTTGTTTTTACAACC  
CTAGCTCAAACAAATTTATTATTTGCGATATAAAATCATATCGAACAAACTCGATGATTTTTTTTTTCT  
TTACGTTATTAATGAACTAAAAATATAGAAAAAACAAGATGAACCAAATTTTACCTATCTAACTAC  
TTAAATATAATATGATTAATTTGGTAAAGTTTGAAGAGTTTCTTTAGGAAATGTGAAATATTGATCA  
CAGTTTCTATTGCTAAAATCACCAACAAAACGCATGTGCGCATTATAAATATGGTTTTACACCTACA  
ACTAGGCTAATAAGTAAATAAGTAGACAACACTAGACTCAGGTTTGAAGAAACATAAAAGCCATATAGC  
GTTTTCTCATTGAACTGCGAACACGATCGTGTGAATGTTGCAGTTTCTAGTTTTGATACAAACAAAC  
AAAAACACAATTTAATCTTAGATTTAAAAAGAAAAAAGAGAACGGAGCCCCTAGCCACTCCTTCAAAC  
GTGTCTTACCAACTCTCTTCTAGAAACAAATTAGGCTTACCTTCTCTTCCAACCTCTCTCTCTCTC  
TCTCTTCTCAAACCGTCTCTCCATAAAGCCCTAATTTCTTCTCATCACAAGAATCAGAAGAAGAAAG  
promoter upstream of -1kb indicated with small letters

Promoter sequences were extracted from TAIR ([www.arabidopsis.org/](http://www.arabidopsis.org/)).

**MYB112 binding sites are highlighted with yellow background.**

DNA fragments used for EMSAs are underlined.

Sequences of primers used for ChIP-qPCR are indicated in various colours.
