# Supplementary material
Source: PubMed Central journal article supplement (PMC4634054)
Supplement: supp_pp.15.00605_PP2015-00605R1_Supplemental_Materialtbl1.pdf [file supp_pp.15.00605_PP2015-00605R1_Supplemental_Materialtbl1.pdf]

**Supplemental Table I. MYB112-dependent up-regulated genes.**

| AGI Code  | Annotation                                | <i>MYB112-IOE</i> ; log <sub>2</sub> (EST-mock) |       |       |         |      | BS |
|-----------|-------------------------------------------|-------------------------------------------------|-------|-------|---------|------|----|
|           |                                           | ATH1                                            |       |       | qRT-PCR |      |    |
|           |                                           | 3 h_1                                           | 5 h_1 | 5 h_2 | 5 h     | SD   |    |
| AT1G48000 | MYB112                                    | 8.20                                            | 10.17 | 10.03 | 9.58    | 0.12 |    |
| AT2G16720 | <b>MYB7</b>                               | 2.17                                            | 2.84  | 1.10  | 1.88    | 0.02 | 1  |
| AT4G34990 | <b>MYB32</b>                              | 0.76                                            | 2.34  | 3.24  | 2.52    | 0.63 | 2  |
| AT4G09460 | <b>MYB6</b>                               | 0.26                                            | 1.10  | 1.55  | 1.54    | 0.16 | 3  |
| AT3G21560 | UGT84A2                                   | 0.91                                            | 1.30  | 1.45  | 1.61    | 0.17 | 0  |
| AT1G22360 | AtUGT85A2                                 | 0.47                                            | 1.87  | 1.87  | 1.49    | 0.15 | 0  |
| AT4G19460 | UDP-glycosyltransferase protein           | 0.07                                            | 1.48  | 1.23  | 2.15    | 0.33 | 2  |
| AT2G35060 | KUP11                                     | 0.68                                            | 1.54  | 1.33  | 1.37    | 0.25 | 0  |
| AT1G66090 | Disease resistance protein                | -0.39                                           | 2.25  | 1.06  | 1.19    | 0.15 | 1  |
| AT1G29230 | CIPK18                                    | 0.00                                            | 2.04  | 2.18  | 4.19    | 0.31 | 3  |
| AT1G54890 | LEA protein-related                       | 0.50                                            | 1.91  | 2.73  | 4.91    | 1.30 | 2  |
| AT3G51300 | ARAC11                                    | -0.04                                           | 1.69  | 1.40  | 2.21    | 0.05 | 3  |
| AT2G25530 | AFG1-like ATPase family protein           | 0.00                                            | 1.37  | 2.11  | 1.16    | 0.13 | 2  |
| AT4G24380 | Serine hydrolase                          | 0.05                                            | 1.57  | 1.38  | 1.94    | 0.31 | 1  |
| AT5G44910 | Toll-Interleukin-Resistance protein       | 0.28                                            | 1.03  | 1.91  | 2.77    | 0.44 | 1  |
| AT2G29340 | NAD-dependent epimerase/dehydratase       | 0.27                                            | 1.20  | 1.06  | 1.45    | 0.35 | 2  |
| AT4G20460 | NAD-dependent epimerase/dehydratase       | 0.50                                            | 1.77  | 2.02  | 1.98    | 0.38 | 0  |
| AT5G52810 | NAD(P)-binding Rossmann-fold protein      | 0.51                                            | 1.45  | 2.00  | 2.07    | 0.26 | 0  |
| AT3G18250 | Putative membrane lipoprotein             | 0.51                                            | 2.77  | 3.86  | 2.08    | 0.67 | 1  |
| AT4G38950 | Kinesin motor family protein              | 0.00                                            | 4.14  | 3.48  | 2.55    | 0.47 | 0  |
| AT5G19875 | Unknown protein                           | 0.28                                            | 2.00  | 2.50  | 2.20    | 0.18 | 1  |
| AT5G38320 | Unknown protein                           | 0.00                                            | 3.12  | 4.88  | 1.88    | 0.13 | 0  |
| AT3G14060 | Unknown protein                           | 0.02                                            | 1.50  | 2.00  | 1.19    | 0.15 | 0  |
| AT1G71830 | SERK1                                     | 0.03                                            | 1.01  | 1.05  | 0.48    | 0.66 | 0  |
| AT1G69870 | NRT1.7                                    | 0.25                                            | 1.43  | 1.48  | 0.47    | 0.03 | 1  |
| AT1G12010 | 2-oxoglutarate Fe(II)-dependent oxygenase | 0.00                                            | 1.00  | 1.08  | 0.40    | 0.26 | 1  |
| AT4G27657 | Unknown protein                           | 0.00                                            | 1.61  | 1.16  | 0.49    | 0.81 | 0  |
| AT3G18560 | Unknown protein                           | -0.02                                           | 1.48  | 1.09  | 0.53    | 0.52 | 3  |
| AT5G58790 | Unknown protein                           | 0.42                                            | 1.14  | 1.33  | 0.60    | 0.01 | 0  |

Change in expression of genes after 3 h (one replicate) and 5 h (two replicates) of *MYB112* induction in EST-treated *MYB112-IOE* seedlings as measured by microarray expression profiling (ATH1) and qRT-PCR. Data are shown as log<sub>2</sub> values normalised to mock-treated control plants. Right column (“BS”) shows the number of MYB112 binding sites within the 1-kb promoter regions. SD, standard deviation.
