# Supplementary material
Source: PubMed Central journal article supplement (PMC4634054)
Supplement: supp_pp.15.00605_PP2015-00605R1_Supplemental_Materialtbl2.pdf [file supp_pp.15.00605_PP2015-00605R1_Supplemental_Materialtbl2.pdf]

**Supplemental Table II. MYB112-dependent down-regulated genes.**

| AGI       | Annotation                      | <i>MYB112-IOE</i> ; log <sub>2</sub> (EST-mock) |       |       |         |      |
|-----------|---------------------------------|-------------------------------------------------|-------|-------|---------|------|
|           |                                 | ATH1                                            |       |       | qRT-PCR |      |
|           |                                 | 3 h_1                                           | 5 h_1 | 5 h_2 | 5 h     | SD   |
| AT3G02550 | LBD41                           | -2.40                                           | -2.31 | -2.20 | -2.39   | 0.20 |
| AT5G62520 | SRO5                            | -1.79                                           | -2.05 | -3.18 | -1.60   | 0.03 |
| AT4G33070 | Pyruvate decarboxylase          | -2.20                                           | -1.76 | -3.45 | -1.55   | 0.06 |
| AT4G10270 | Wound-responsive family protein | -1.69                                           | -2.01 | -1.42 | -1.65   | 0.47 |
| AT5G42200 | RING/U-box superfamily protein  | -2.21                                           | -2.07 | -1.19 | -0.82   | 0.11 |
| AT3G10040 | Transcription factor            | -2.64                                           | -1.73 | -2.69 | -1.42   | 0.38 |
| AT4G24110 | Unknown protein                 | -1.64                                           | -1.84 | -2.86 | -1.56   | 0.24 |
| AT5G39890 | Unknown protein                 | -2.95                                           | -1.51 | -2.68 | -1.53   | 0.23 |
| AT1G33055 | Unknown protein                 | -2.74                                           | -2.03 | -1.70 | -1.28   | 0.43 |
| AT5G66985 | Unknown protein                 | -2.42                                           | -1.31 | -1.39 | -1.31   | 0.38 |
| AT1G24260 | SEP3                            | 0.24                                            | -1.32 | -1.85 | n.t.    | n.t. |
| AT1G13300 | HRS1                            | -0.85                                           | -1.24 | -2.44 | n.t.    | n.t. |
| AT4G17460 | HAT1                            | -0.45                                           | -1.26 | -1.00 | n.t.    | n.t. |
| AT5G47370 | HAT2                            | -0.64                                           | -1.23 | -1.27 | n.t.    | n.t. |
| AT2G43060 | IBH1, ILI1 binding bHLH 1       | -0.62                                           | -1.26 | -1.98 | n.t.    | n.t. |
| AT3G27170 | CLC-B                           | 0.16                                            | -1.03 | -1.17 | n.t.    | n.t. |
| AT1G15960 | NRAMP6                          | -0.40                                           | -1.20 | -1.17 | n.t.    | n.t. |
| AT3G19470 | F-box family protein            | -0.07                                           | -1.35 | -1.04 | n.t.    | n.t. |
| AT4G37770 | ACS8                            | -0.51                                           | -1.10 | -1.76 | n.t.    | n.t. |
| AT5G61160 | AACT1                           | 0.40                                            | -1.10 | -1.24 | n.t.    | n.t. |
| AT1G78050 | PGM                             | -0.42                                           | -1.14 | -1.32 | n.t.    | n.t. |
| AT1G75960 | AMP-binding protein, putative   | -0.03                                           | -1.04 | -1.16 | n.t.    | n.t. |
| AT2G26020 | PDF1.2b                         | 0.46                                            | -1.88 | -3.53 | n.t.    | n.t. |
| AT2G43590 | Chitinase. putative             | -0.28                                           | -1.24 | -3.43 | n.t.    | n.t. |
| AT3G07350 | DUF506                          | -0.18                                           | -1.02 | -1.85 | n.t.    | n.t. |
| AT1G21050 | DUF617                          | -0.76                                           | -1.16 | -1.80 | n.t.    | n.t. |
| AT5G12050 | Unknown protein                 | -0.44                                           | -1.16 | -1.04 | n.t.    | n.t. |
| AT4G28085 | Unknown protein                 | 0.00                                            | -1.30 | -1.55 | n.t.    | n.t. |

Change in expression of genes after 3 h (one replicate) and 5 h (two replicates) of *MYB112* induction in EST-treated *MYB112-IOE* seedlings as measured by microarray expression profiling (Affymetrix ATH1) and qRT-PCR. Data are shown as log<sub>2</sub> values normalised to mock-treated control plants; n.t., not tested. SD, standard deviation.
