# Supplementary material
Source: PubMed Central journal article supplement (PMC4634054)
Supplement: supp_pp.15.00605_PP2015-00605R1_Supplemental_Materialtbl3.pdf [file supp_pp.15.00605_PP2015-00605R1_Supplemental_Materialtbl3.pdf]

### Supplemental Table III. Oligonucleotide Sequences.

#### **MYB112 T-DNA insertion lines**

|         |                             |
|---------|-----------------------------|
| SALK_LP | 5'-GCAAGAGTCGGTTTTAACAAAAAC |
| SALK_RP | 5'-TTAGATGAGAGGGCCAAATCC    |
| GK_LP   | 5'-AACGTCTCAATTTACATGGG     |
| GK_LP   | 5'-GGAGTTCCATCTTCCTTCACC    |
| LB      | 5'-GCGTGGACCGCTTGCTGCAACT   |

#### **35S:MYB112**

|                |                                               |                                       |
|----------------|-----------------------------------------------|---------------------------------------|
| MYB112-OE-fwd. | 5'- <u>AAGCTT</u> ATGAATATAAGTAGAACAGAATTCGCA | added <i>Hind</i> III site underlined |
| MYB112-OE-rew. | 5'- <u>AAGCTT</u> CTACTGTATGAGCCACTTGTTGA     | added <i>Hind</i> III site underlined |

#### **35S:MYB112-GFP**

|                    |                                                 |                                                 |
|--------------------|-------------------------------------------------|-------------------------------------------------|
| MYB112-GFP-OE-fwd. | <u>AAAAAGCAGGCTTA</u> ATGAATATAAGTAGAACAGAATTCG | <i>attB</i> site for Gateway cloning underlined |
| MYB112-GFP-OE-rew. | <u>AGAAAGCTGGGT</u> CTACTGTATGAGCCACTTGTTGA     | <i>attB</i> site for Gateway cloning underlined |

#### **MYB112 IOE**

|                 |                                               |                                    |
|-----------------|-----------------------------------------------|------------------------------------|
| MYB112-IOE-fwd. | 5'- <u>CTCGAG</u> ATGAATATAAGTAGAACAGAATTCGCA | added <i>Xho</i> I site underlined |
| MYB112-IOE-rew. | 5'- <u>ACTAGT</u> CTACTGTATGAGCCACTTGTTGA     | added <i>Spe</i> I site underlined |

#### **MYB44 IOE**

|                |                                             |                                    |
|----------------|---------------------------------------------|------------------------------------|
| MYB44-IOE-fwd. | 5'-AGTCG <u>CTCGAG</u> ATGGCTGATAGGATCAAAGG | added <i>Xho</i> I site underlined |
| MYB44-IOE-rew. | 5'-TCATC <u>ACTAGT</u> CTACTCGATTCTCCCAACT  | added <i>Spe</i> I site underlined |

#### **ProMYB112:GUS**

|                    |                                             |                                     |
|--------------------|---------------------------------------------|-------------------------------------|
| MYB112:GUS-fwd.    | 5'- <u>GAATTC</u> GAATAGGGGGAGTATTATTTTTGAA | added <i>Eco</i> RI site underlined |
| MYB112:GUS-rew.    | 5'- <u>CCATGG</u> GCTTTGAGATTCTTAGAACTTGTG  | added <i>Nco</i> I site underlined  |
| MYB112:nested-rew. | 5'-TCCATGGACCTCTCCTTATTTCT                  |                                     |

### **MYB112 CELD**

MYB112-CELD-fwd.  
MYB112-CELD-rev.

5'-GTATAAG**GCTAGCA**AATATAAGTAGAACAGAATTCGC  
5'-CATGTC**GGATCC**CTGTATGAGCCACTTGTTGAG

added *NheI* site underlined  
added *Bam*HI site underlined

### **Pro:Fluc**

MYB32:LUC-fwd.  
MYB32:LUC-rev.  
MYB7:LUC-fwd.  
MYB7:LUC-rev.  
MYB6:LUC-fwd.  
MYB6:LUC-rev.  
CIPK18:LUC-fwd. (Neg)  
CIPK18:LUC-rev. (Neg)

5'-**CACC**CTTATTTCAAATATCCCC  
5'-CTTTCTTCTTCTGATTCTTGTG  
5'-**CACC**GCGTGTGCATCAACTAT  
5'-AATCAAAGTTAAGGTGTATATTGG  
5'-**CACC**CACTTGGATTTCTCTC  
5'-GTGAATGAAGAAGATGGTGTAAAG  
5'-**CACC**CTTAAGCAAATTCGC  
5'-CCGTTGCCAAAGAAAGAGC

underlined nucleotides allow for directional TOPO cloning  
underlined nucleotides allow for directional TOPO cloning  
underlined nucleotides allow for directional TOPO cloning  
underlined nucleotides allow for directional TOPO cloning

### **ChIP-qPCR**

At3g18040-fwd. (neg. 1)  
At3g18040-rev. (neg. 1)  
AT2G22180-fwd. (neg. 2)  
AT2G22180-rev. (neg. 2)  
MYB6\_1-fwd.  
MYB6\_1-rev.  
MYB6\_2-fwd.  
MYB6\_2-rev.  
MYB7-fwd.  
MYB7-rev.  
MYB32\_1-fwd.  
MYB32\_1-rev.  
MYB32\_2-fwd.  
MYB32\_2-rev.

5'-CTATCTTCCGCATCCTTCGGA  
5'-TCTCAGGTATGGCGTGCTTCTC  
5'-GTTGCGTATGAAGATGACGTGG  
5'-GCCGAGTTAACGACGTGCTTAT  
5'-AGGAGAAAAAGTAAAGAGACAAGAAAA  
5'-TGGAGATAAAGTGAGGCTGTGC  
5'-CACAAACACAGCAAAGCACAGCC  
5'-CCCATGGTGAATGAAGAAGATGGTG  
5'-TCAAAAATAATTGCAAAAGATGCCCA  
5'-TAACCAGACCCGGCCCAACATA  
5'-TGGAAGGTCACGAACCACTCCC  
5'-ACACAAACAAGGTTGGTTTTGAGGG  
5'-ACTTAATTTGGTCATTTGGATGCCC  
5'-TGGATGGTTTTCGTACTGCAACG
